# Supplementary material
Source: PubMed Central journal article supplement (PMC4992983)
Supplement: NIHMS805990-supplement-Supporting_Information.pdf [file NIHMS805990-supplement-Supporting_Information.pdf]

# **Liposome-crosslinked hybrid hydrogels for glutathione-triggered delivery of multiple cargo molecules**

## **Supporting Information**

**Yingkai Liang,<sup>1</sup> Kristi L. Kiick<sup>1,2,3\*</sup>**

<sup>1</sup>Department of Materials Science and Engineering, University of Delaware, Newark, DE 19716,

USA

<sup>2</sup>Department of Biomedical Engineering, University of Delaware, Newark, DE 19716, USA

<sup>3</sup>Delaware Biotechnology Institute, 15 Innovation Way, Newark, DE 19716, USA

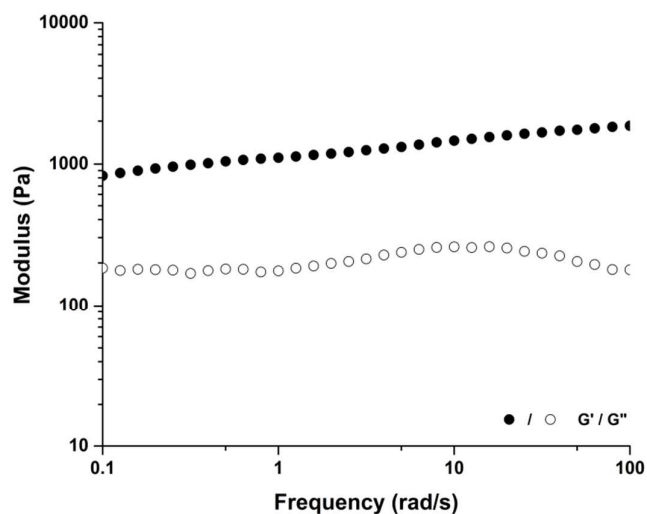

**Figure S1.** Representative oscillatory frequency sweep of the arylthiol-based, liposome-crosslinked hydrogels (1:2 Mal:SH ratio) in pH=7.0 bis-tris buffer at 37°C. Modest difference between  $G'$  and  $G''$  was observed at low frequency range and frequency dependence of both moduli was shown due to the hydrophobic interactions between the aromatic moieties of PEG arylthiol and lipid bilayers.

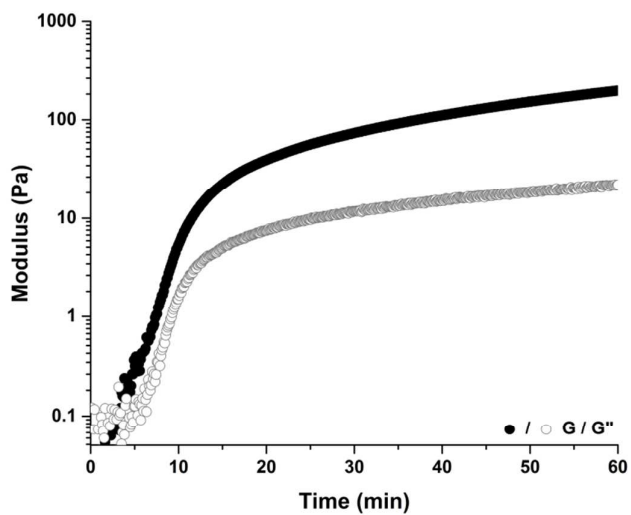

**Figure S2.** Representative oscillatory time sweep of the liposome-crosslinked hydrogels (1:2 Mal:SH ratio) in pH=7.0 bis-tris buffer at 37°C.

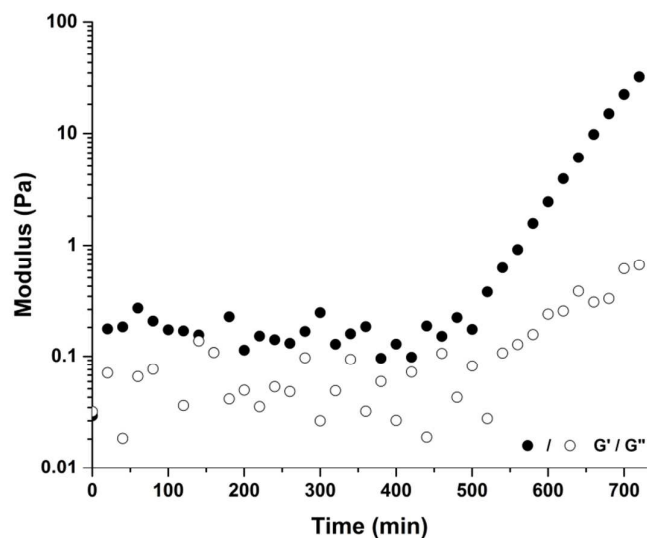

**Figure S3.** Oscillatory time sweep of 4-arm alkyl PEG-SH polymers (6wt%, polymer only) as a disulfide control, in pH=7.0 bis-tris buffer at 37°C.

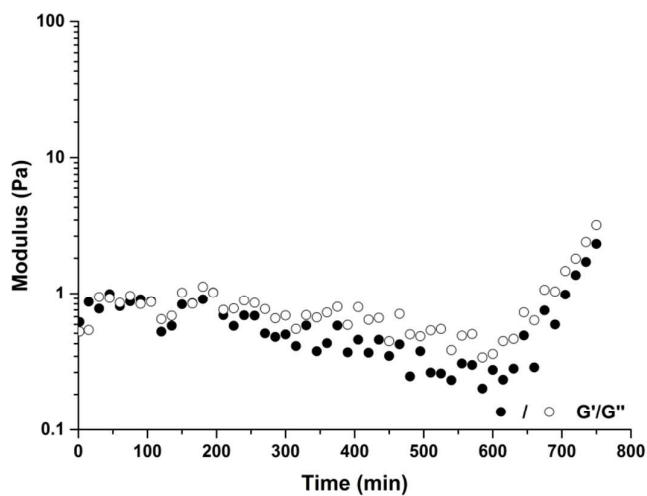

**Figure S4.** Oscillatory time sweep of the mixture of 10mM L- $\alpha$ -phosphatidylcholine (Egg PC) liposomes and 4-arm alkyl PEG-SH polymers (6wt%) as a non-maleimide liposome control, in pH=7.0 bis-tris buffer at 37°C.

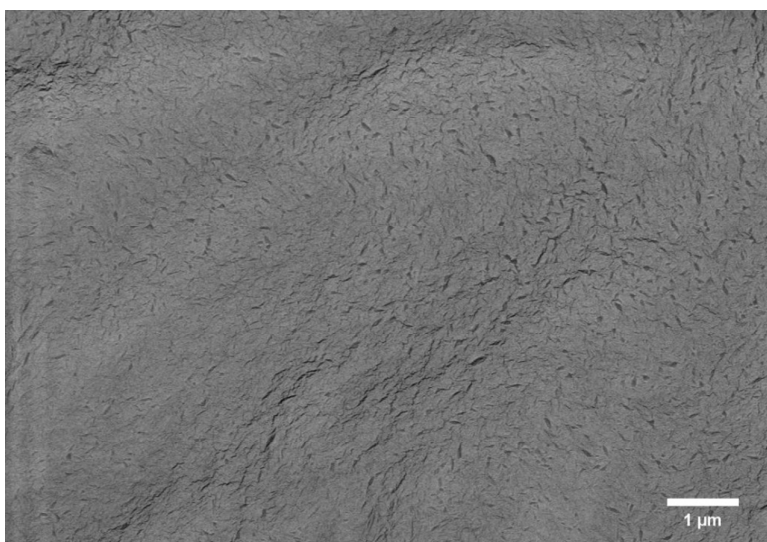

**Figure S5.** Scanning electron microscopy (SEM) images of 6wt% PEG hydrogel control lacking liposomes.

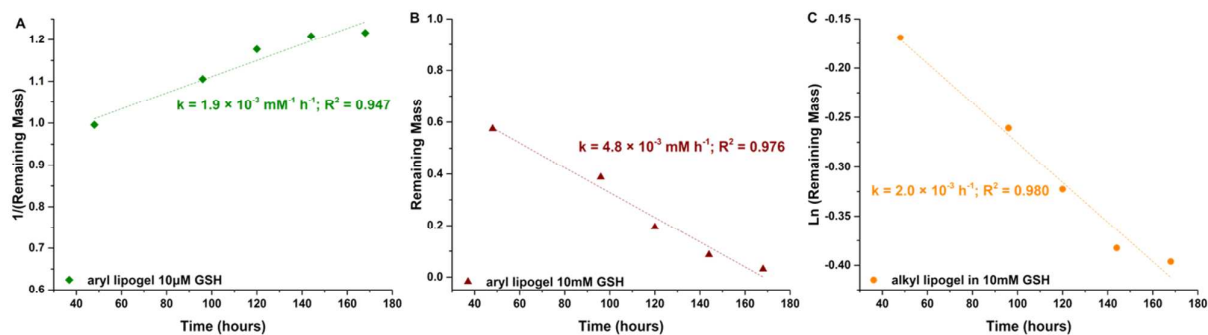

**Figure S6.** Fitting of the degradation profiles from liposome-crosslinked hybrid hydrogels synthesized from arylthiol-PEG and alkylthiol-PEG respectively. A) Degradation kinetics of the aryl lipogel in 10  $\mu$ M GSH; fitting is performed based on the rate law for second order kinetics ( $-\frac{d[M]}{dt} = k[M][GSH] \approx k[M]^2$ ) considering the comparable concentration of GSH and crosslinks. B) Degradation kinetics of the aryl lipogel in 10 mM GSH; fitting is performed based on zero-order kinetics ( $-\frac{d[M]}{dt} = k$ ) given the almost linear release observed. C) Degradation kinetics of the alkyl lipogel in 10 mM GSH; fitting is performed based on first-order kinetics ( $-\frac{d[M]}{dt} = k[M]$ ) because of the excess amount of GSH, which renders its concentration unchanged over the course of the experiment.

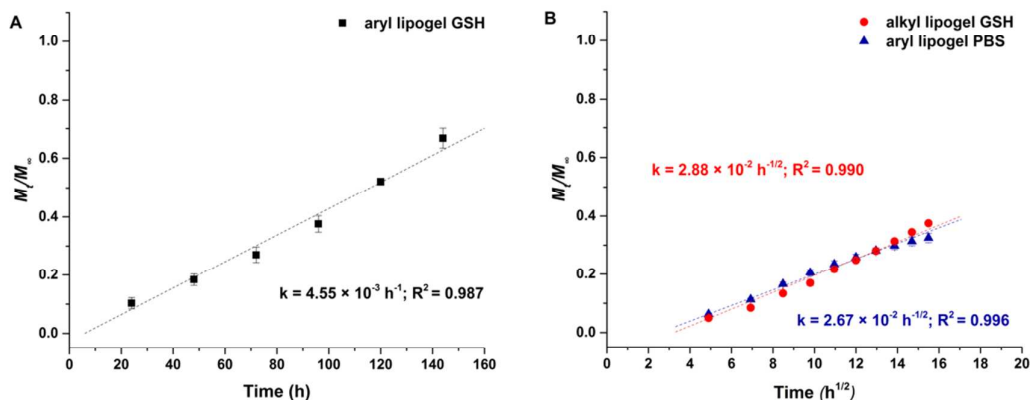

**Figure S7.** Fitting of the DOX release profiles from the liposome-crosslinked hybrid hydrogels (A) with network degradation and (B) lacking network degradation. A) Fitting of DOX release data is based on the the Ritger–Peppas equation ( $n=1$ ). Data plotted as  $M_t/M_\infty$  versus  $t$ . B) Fitting of DOX release data is based on the early-time approximation of Fickian diffusion. Data plotted as  $M_t/M_\infty$  versus  $t^{1/2}$ .

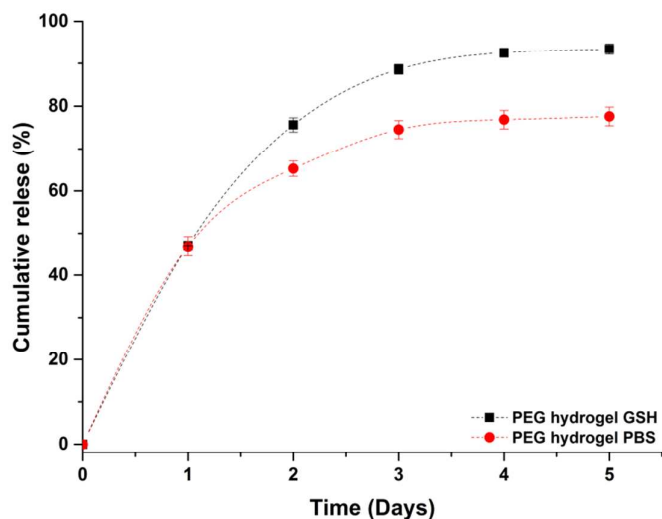

**Figure S8.** In vitro DOX release profiles from 6wt% PEG hydrogel control prepared by reacting 4-arm aryl PEG-SH and 4-arm PEG-maleimide. Release experiments were carried out in 10mM GSH in PBS and PBS solutions alone respectively at 37°C. Mean and S.D. are shown ( $n = 2$ ).

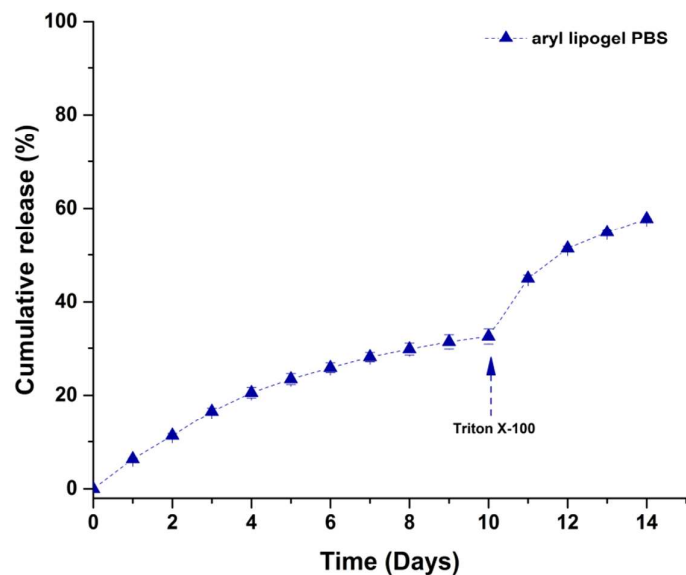

**Figure S9.** In vitro release of DOX from the liposome-crosslinked hydrogels at 37°C in PBS. 10% Triton™ X-100 was applied to the aryl lipogels incubated in PBS at Day 10, resulting in the liberation of more liposome-encapsulated DOX. Mean and S.D. are shown (n = 3).

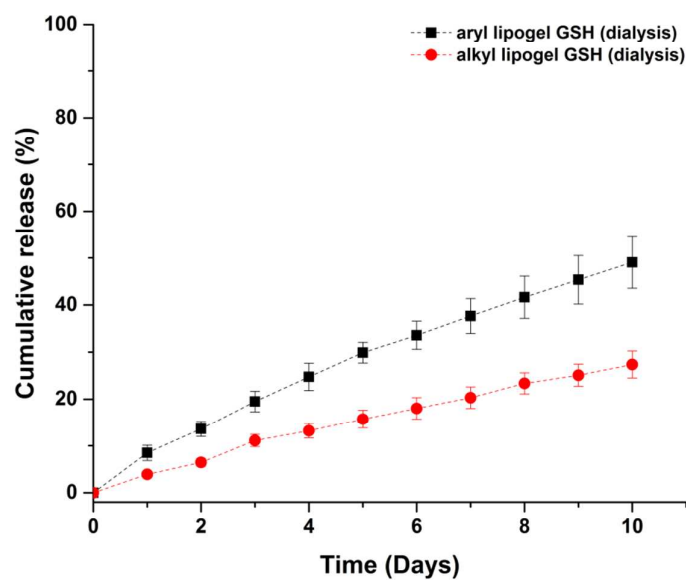

**Figure S10.** In vitro release of freely diffusing DOX from the liposome-crosslinked hydrogels in 10mM GSH solutions, as monitored after dialysis in a cup-like mini dialysis device (MWCO 3.5K) at 37°C. Mean and S.D. are shown (n = 3).

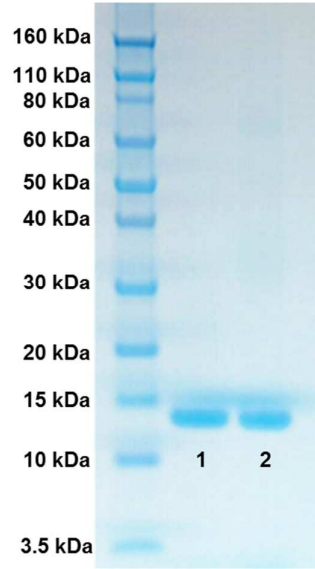

**Figure S11.** SDS-PAGE electrophoresis of cytochrome *c* (Lane 1) and a mixture of cytochrome *c* and 4-arm PEG arylthiol (Lane 2). The cytochrome *c* was incubated with PEG arylthiol polymers (1mg cytochrome *c* and 3mg of PEG polymer, the same amount as was employed in hydrogel formation, were incubated for 1h at 37°C), and the mixture electrophoresed almost identically to native cytochrome *c*, demonstrating the side reactions between the protein and polymers were insignificant within the timescale of crosslinking.

#### Fitting of the release profiles of DOX and cytochrome *c*

The release constant  $k$  of DOX from the aryl lipogel in 10mM GSH was calculated based on the linear fitting of the release data based on the Ritger–Peppas equation:

$$\frac{M_t}{M_\infty} = kt^n, \text{ where } n=1 \text{ for zero-order release. (1)}$$

The release constant  $k$  of DOX from the lipogels with first order release (lacking network degradation) was calculated based on the early-time approximation of Fickian diffusion (Higuchi model,  $0 \leq \frac{M_t}{M_\infty} \leq 0.6$ ):

$$\frac{M_t}{M_\infty} = 4 \left( \frac{Dt}{\pi h^2} \right)^{1/2}, k = 4 \left( \frac{D}{\pi h^2} \right)^{1/2}; \text{ (2)}$$

The release constant  $k$  of cytochrome *c* was calculated based on the late-time approximation of Fickian diffusion ( $0.4 \leq \frac{M_t}{M_\infty} \leq 1$ ):

$$\frac{M_t}{M_\infty} = 1 - \left( \frac{8}{\pi^2} \right) \exp[(-\pi^2 Dt)/h^2], k = (-\pi^2 D)/h^2; \text{ (3)}$$

$M_t$  is the amount of drug released at time  $t$ ,  $M_\infty$  is the total mass of drug loaded into the hydrogel,  $D$  is the diffusion coefficient of the drug within the polymer matrix,  $\pi$  is 3.14, and  $h$  is the thickness of the hydrogel.
